# Supplementary material for: Exploring the medication duration based on the effect of traditional Chinese medicine on postoperative stage I-III colorectal patients: a retrospective cohort study
Source: PubMed Central journal article supplement (PMC5355114; doi:10.18632/oncotarget.14567), 2017-01-09
Supplement: oncotarget-08-13488-s001.pdf [file oncotarget-08-13488-s001.pdf]

# Exploring the medication duration based on the effect of traditional Chinese medicine on postoperative stage I-III colorectal patients: a retrospective cohort study

## Supplementary Materials

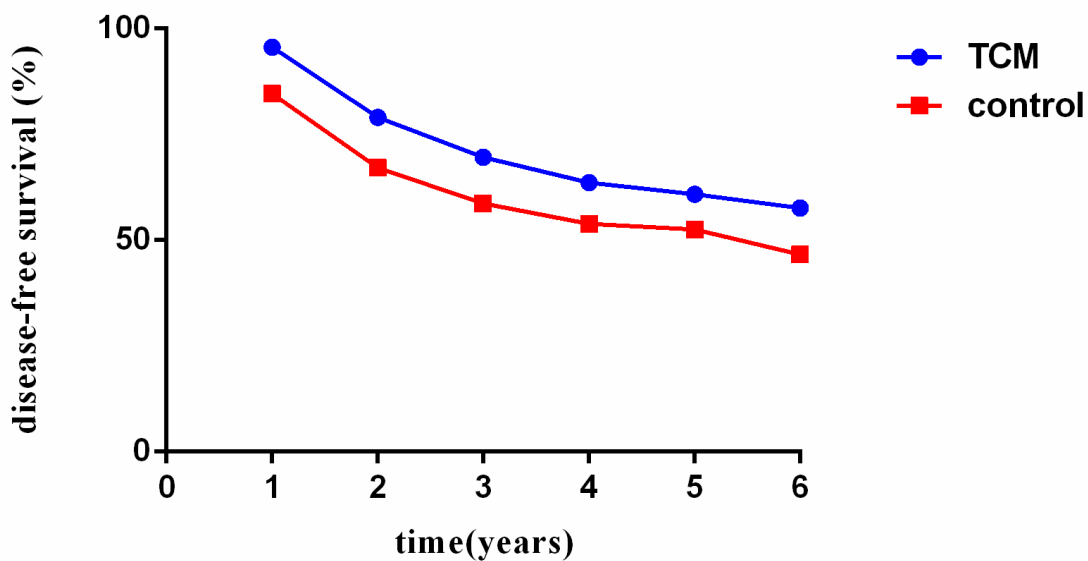

Supplementary Figure 1: 1–6 year disease-free survival in the TCM and control group.

**Supplementary Table 1: Baseline and tumor characteristics of patients after propensity score matching**

|                      | TCM group ( <i>n</i> = 274) | Control group ( <i>n</i> = 274) | <i>p</i> value |
|----------------------|-----------------------------|---------------------------------|----------------|
| age (y)              |                             |                                 |                |
| < 60                 | 90                          | 90                              | 1.00           |
| ≥ 60                 | 184                         | 184                             |                |
| gender               |                             |                                 |                |
| male                 | 146                         | 145                             | 0.93           |
| female               | 128                         | 129                             |                |
| location             |                             |                                 |                |
| colon                | 165                         | 166                             | 0.93           |
| rectum               | 109                         | 108                             |                |
| pathology            |                             |                                 |                |
| adenocarcinoma       | 229                         | 229                             | 0.84           |
| non-adenocarcinoma   | 1                           | 2                               |                |
| unknown              | 44                          | 43                              |                |
| histodifferentiation |                             |                                 |                |
| poorly               | 26                          | 28                              | 0.94           |
| moderately           | 150                         | 146                             |                |
| well                 | 13                          | 11                              |                |
| known                | 85                          | 89                              |                |
| TNM stage            |                             |                                 |                |
| I                    | 49                          | 46                              | 0.89           |
| II                   | 126                         | 124                             |                |
| III                  | 99                          | 104                             |                |
| chemotherapy         |                             |                                 |                |
| yes                  | 186                         | 193                             | 0.52           |
| no                   | 88                          | 81                              |                |
| radiotherapy         |                             |                                 |                |
| yes                  | 17                          | 15                              | 0.72           |
| no                   | 257                         | 259                             |                |
| comorbidities        |                             |                                 |                |
| yes                  | 134                         | 126                             | 0.49           |
| no                   | 140                         | 148                             |                |

**Supplementary Table 2: Results of multiple factor analysis through cox regression**

| <b>Factor</b>        | <b>HR</b> | <b>95% CI</b> | <b>P</b> |
|----------------------|-----------|---------------|----------|
| age                  | 0.73      | 0.58–0.91     | 0.01*    |
| gender               | 1.11      | 0.86–1.42     | 0.42     |
| location             | 0.79      | 0.63–1.01     | 0.06*    |
| pathology            |           |               |          |
| non-AC vs AC         | 1.32      | 0.40–4.28     | 0.65     |
| unknown vs AC        | 1.01      | 0.69–1.47     | 0.96     |
| histodifferentiation |           |               |          |
| moderately vs poorly | 0.86      | 0.58–1.25     | 0.42     |
| well vs poorly       | 1.13      | 0.51–2.48     | 0.77     |
| unknown vs poorly    | 1.53      | 0.99–2.36     | 0.05     |
| TNM stage            |           |               |          |
| II vs I              | 2.74      | 1.65–4.57     | 0.00*    |
| III vs I             | 6.48      | 3.90–10.74    | 0.00*    |
| chemotherapy         | 1.24      | 0.91–1.71     | 0.18     |
| radiotherapy         | 2.84      | 2.03–3.97     | 0.00*    |
| TCM                  | 1.67      | 1.33–2.11     | 0.00*    |
| comorbidities        | 1.03      | 0.81–1.30     | 0.82     |

Abbreviations: HR, hazard ration; CI, confidence interval; AC, adenocarcinoma; TCM traditional Chinese medicine; \*statistical difference.
